# Supplementary material
Source: PubMed Central journal article supplement (PMC6580550)
Supplement: ml9b00174_si_001.pdf [file ml9b00174_si_001.pdf]

## ***Supporting Information***

Chain-shortened myostatin inhibitory peptides improve grip strength in mice

*Kentaro Takayama, Tomo Asari, Mariko Saitoh, Kei Nirasawa, Eri Sasaki, Yoshimi Roppongi, Akari Nakamura, Yusuke Saga, Takahiro Shimada, Hiroaki Ikeyama, Akihiro Taguchi, Atsuhiko Taniguchi, Yoichi Negishi, and Yoshio Hayashi\**

### *Table of contents*

|                                                                                                                                                        |             |
|--------------------------------------------------------------------------------------------------------------------------------------------------------|-------------|
| Materials and Experimental procedure                                                                                                                   | page S2–S6  |
| Analytical HPLC chromatograms                                                                                                                          | page S7–S29 |
| <b>Figure S1.</b> Induction of GAS muscle hypertrophy by <b>E31R</b> -treatment in Duchenne muscular dystrophic model <i>mdx</i> mice.                 | page S30    |
| <b>Figure S2.</b> Induction of GAS muscle hypertrophy by peptide <b>3</b> - or <b>E31R</b> -treatment in wild-type mice.                               | page S31    |
| <b>Figure S3.</b> The aliphatic residue-directed SAR studies of peptide <b>1</b> using either chyclohexylglycine (Chg) or phenylglycine (Phg) residue. | page S32    |
| <b>Figure S4.</b> D-form scanning in peptide <b>1</b> .                                                                                                | page S33    |
| <b>Figure S5.</b> Investigation of morphological change to peptide treatment.                                                                          | page S34    |

## 1. Materials

Reagents and solvents were purchased from Wako Pure Chemical Industries (Osaka, Japan), and Sigma-Aldrich (St. Louis, MO), Watanabe Chemical Industries (Hiroshima, Japan), and Tokyo Chemical Industries (Tokyo, Japan). All were used as received. Sterile Dulbecco's Modified Eagle's Medium (DMEM) and fetal bovine serum (FBS) were purchased from Nacalai Tesque (Kyoto, Japan) and Nichirei Bioscience Inc. (Tokyo, Japan), respectively. Sterile 100-mm dishes, 96-well clear-wall poly-D-Lys-coated plates and 96-well white-wall plates were purchased from BD Biosciences (Franklin Lakes, NJ), Thermo Fisher Scientific (Waltham, MA) and Corning (Cambridge, MA), respectively. Plasmids, FuGENE HD and Dual-Luciferase Reporter Assay System for cell-based assay were purchased from Promega (Madison, WI). Recombinant human/mouse/rat myostatin and mouse myostatin-derived recombinant prodomain protein were purchased from Merck Millipore (Billerica, MA) and R&D Systems (Minneapolis, MN), respectively.

## 2. Synthesis of peptide derivatives

In the synthesis of all peptides, protected peptide-bound resins were automatically prepared using Prelude (Gyros Protein Technologies, Inc., Tucson, AZ). Fmoc-NH-SAL resin (54 mg, 0.02 mmol) and Fmoc-amino acids (0.2 mmol) were sequentially coupled using the *O*-(7-Aza-1*H*-benzotriazol-1-yl)-*N,N,N',N'*-tetra-methyluronium hexafluorophosphate (HATU, 0.2 mmol)-1-hydroxy-7-azabenzotriazole (HOAt, 0.2 mmol)-*N,N'*-diisopropylethylamine (DIEA) method for 30 min in *N,N*-dimethylformamide (DMF, 2.0 mL) after removing Fmoc group with 20% piperidine-DMF (2.5 mL, 20 min) in each step. The resins were treated with TFA-*m*-cresol-thioanisole-EDT (4.3 mL, 40:1:1:1, v:v:v:v) for 150 min at rt to obtain crude peptides. Purified peptides as a TFA salt were obtained by preparative RP-HPLC in a 0.1% aqueous TFA-CH<sub>3</sub>CN system, and solubilized in DMSO as 3 mM stock solutions for the reporter assay. The purity of synthesized peptides was >95% in RP-HPLC analysis using a C18 reverse-phase column [4.6 x 150 mm; COSMOSIL 5C18-AR-II (column 1), COSMOSIL 5C4-AR-300 (column 2), or SunFire C18 5 μm (column 3)] with a binary solvent system: a linear gradient of CH<sub>3</sub>CN (20-40%, 40 min; 30-50%, 40 min for peptides **6**, **7b**, **7d**, **7e**, **E31K**, and **E31R**; 5-65%, 30 min for peptide **4b**; 25-45%, 40 min for peptides **8a** and **8c**; 20-50%, 30 min for peptide **8b**) in 0.1% aqueous TFA at a flow rate of 1.0 mL/min, detected at UV 230 nm. Yields of all products obtained as a white powder were calculated as TFA salts. HR-MS (TOF MS ES+) was recorded on a micromass LCT. Analytical data of synthetic peptide derivatives are shown below.

peptide **4a**: Yield of 18%; HRMS  $m/z$  [M+H]<sup>+</sup> found 1995.2606 (calcd. for C<sub>93</sub>H<sub>164</sub>N<sub>27</sub>O<sub>21</sub> 1995.2595); HPLC purity 99.8% (t<sub>R</sub> = 22.77 min) (column 1).

peptide **4b**: Yield of 29%; HRMS  $m/z$  [M+H]<sup>+</sup> found 2068.2524 (calcd. for C<sub>98</sub>H<sub>163</sub>N<sub>28</sub>O<sub>21</sub> 2068.2548); HPLC purity 100% (t<sub>R</sub> = 17.14 min) (column 2).

peptide **5**: Yield of 20%; HRMS  $m/z$  [M+H]<sup>+</sup> found 1986.2250 (calcd. for C<sub>96</sub>H<sub>161</sub>N<sub>24</sub>O<sub>21</sub> 1986.2268); HPLC purity 100% (t<sub>R</sub> = 23.90 min) (column 3).

peptide **6**: Yield of 13%; HRMS  $m/z$  [M+3H]<sup>3+</sup>/3 found 725.4232 (calcd. for C<sub>109</sub>H<sub>164</sub>N<sub>26</sub>O<sub>21</sub> 725.4266); HPLC purity 99.1% (t<sub>R</sub> = 13.47 min) (column 3).

**E31K:** Yield of 16%; HRMS  $m/z$   $[M+H]^+$  found 2173.3159 (calcd. for  $C_{110}H_{170}N_{27}O_{19}$  2173.3166); HPLC purity 99.5% ( $t_R$  = 8.64 min) (column 1).

**E31R:** Yield of 12%; HRMS  $m/z$   $[M+H]^+$  found 2201.3240 (calcd. for  $C_{110}H_{170}N_{29}O_{19}$  2201.3228); HPLC purity 99.4% ( $t_R$  = 9.04 min) (column 1).

**E31N:** Yield of 5.2%; HRMS  $m/z$   $[M+H]^+$  found 2159.2668 (calcd. for  $C_{108}H_{164}N_{27}O_{20}$  2159.2646); HPLC purity 97.7% ( $t_R$  = 32.97 min) (column 1).

**E31Q:** Yield of 8.7%; HRMS  $m/z$   $[M+H]^+$  found 2173.2837 (calcd. for  $C_{109}H_{166}N_{27}O_{20}$  2173.2802); HPLC purity 96.9% ( $t_R$  = 34.16 min) (column 1).

peptide **7a:** Yield of 4.3%; HRMS  $m/z$   $[M+H]^+$  found 2227.3347 (calcd. for  $C_{112}H_{172}N_{29}O_{19}$  2227.3384); HPLC purity 98.5% ( $t_R$  = 30.81 min) (column 1).

peptide **7b:** Yield of 4.3%; HRMS  $m/z$   $[M+H]^+$  found 2227.3345 (calcd. for  $C_{112}H_{172}N_{29}O_{19}$  2227.3384); HPLC purity 100% ( $t_R$  = 10.25 min) (column 1).

peptide **7c:** Yield of 4.3%; HRMS  $m/z$   $[M+H]^+$  found 2253.3604 (calcd. for  $C_{114}H_{174}N_{29}O_{19}$  2253.3541); HPLC purity 98.5% ( $t_R$  = 30.81 min) (column 1).

peptide **7d:** Yield of 10%; HRMS  $m/z$   $[M+H]^+$  found 2235.3057 (calcd. for  $C_{113}H_{168}N_{29}O_{19}$  2235.3071); HPLC purity 99.7% ( $t_R$  = 10.03 min) (column 1).

peptide **7e:** Yield of 17%; HRMS  $m/z$   $[M+H]^+$  found 2235.3086 (calcd. for  $C_{113}H_{168}N_{29}O_{19}$  2235.3071); HPLC purity 100% ( $t_R$  = 9.01 min) (column 1).

peptide **8a:** Yield of 8.5%; HRMS  $m/z$   $[M+H]^+$  found 2253.3518 (calcd. for  $C_{114}H_{174}N_{29}O_{19}$  2253.3541); HPLC purity 95.4% ( $t_R$  = 23.26 min) (column 1).

peptide **8b:** Yield of 12%; HRMS  $m/z$   $[M+H]^+$  found 2253.3506 (calcd. for  $C_{114}H_{174}N_{29}O_{19}$  2253.3541); HPLC purity 97.7% ( $t_R$  = 18.26 min) (column 2).

peptide **8c:** Yield of 7.4%; HRMS  $m/z$   $[M+H]^+$  found 2253.3503 (calcd. for  $C_{114}H_{174}N_{29}O_{19}$  2253.3541); HPLC purity 98.8% ( $t_R$  = 21.79 min) (column 1).

**I30Chg:** Yield of 21%; HRMS  $m/z$   $[M+5H]^{5+}/5$  found 582.1447 (calcd. for  $C_{132}H_{225}N_{42}O_{32}$  582.1454); HPLC purity 100.0% ( $t_R$  = 21.16 min) (column 3).

**I33Chg:** Yield of 22%; HRMS  $m/z$   $[M+H]^+$  found 2910.7319 (calcd. for  $C_{132}H_{225}N_{42}O_{32}$  2910.7270); HPLC purity 97.6% ( $t_R$  = 19.86 min) (column 3).

**I35Chg:** Yield of 21%; HRMS  $m/z$   $[M+H]^+$  found 2910.7297 (calcd. for  $C_{132}H_{225}N_{42}O_{32}$  2910.7270); HPLC purity 99.2% ( $t_R$  = 18.84 min) (column 3).

**I37Chg:** Yield of 11%; HRMS  $m/z$   $[M+H]^+$  found 2910.7236 (calcd. for  $C_{132}H_{225}N_{42}O_{32}$  2910.7270); HPLC purity 97.9% ( $t_R$  = 20.56 min) (column 3).

**I30Phg:** Yield of 23%; HRMS  $m/z$   $[M+H]^+$  found 2904.6721 (calcd. for  $C_{132}H_{219}N_{42}O_{32}$  2904.6801); HPLC purity 97.6% ( $t_R$  = 17.62 min) (column 3).

**I33Phg:** Yield of 17%; HRMS  $m/z$   $[M+H]^+$  found 2904.6746 (calcd. for  $C_{132}H_{219}N_{42}O_{32}$  2904.6801); HPLC purity 96.3% ( $t_R = 17.22$  min) (column 3).

**I35Phg:** Yield of 22%; HRMS  $m/z$   $[M+H]^+$  found 2904.6794 (calcd. for  $C_{132}H_{219}N_{42}O_{32}$  2904.6801); HPLC purity 97.3% ( $t_R = 17.58$  min) (column 3).

**I37Phg:** Yield of 11%; HRMS  $m/z$   $[M+H]^+$  found 2904.6709 (calcd. for  $C_{132}H_{219}N_{42}O_{32}$  2904.6801); HPLC purity 100% ( $t_R = 15.70$  min) (column 3).

**L38Chg:** Yield of 9.5%; HRMS  $m/z$   $[M+H]^+$  found 2910.7280 (calcd. for  $C_{132}H_{225}N_{42}O_{32}$  2910.7270); HPLC purity 96.4% ( $t_R = 19.68$  min) (column 3).

**L41Chg:** Yield of 5.7%; HRMS  $m/z$   $[M+H]^+$  found 2910.7285 (calcd. for  $C_{132}H_{225}N_{42}O_{32}$  2910.7270); HPLC purity 98.3% ( $t_R = 20.35$  min) (column 3).

**L43Chg:** Yield of 3.2%; HRMS  $m/z$   $[M+4H]^{4+}/4$  found 728.6867 (calcd. for  $C_{132}H_{225}N_{42}O_{32}$  728.6818); HPLC purity 99.0% ( $t_R = 20.80$  min) (column 3).

**L38Phg:** Yield of 5.4%; HRMS  $m/z$   $[M+H]^+$  found 2904.6799 (calcd. for  $C_{132}H_{219}N_{42}O_{32}$  2904.6801); HPLC purity 95.6% ( $t_R = 17.60$  min) (column 3).

**L41Phg:** Yield of 2.5%; HRMS  $m/z$   $[M+H]^+$  found 2904.6768 (calcd. for  $C_{132}H_{219}N_{42}O_{32}$  2904.6801); HPLC purity 98.0% ( $t_R = 17.06$  min) (column 3).

**L43Phg:** Yield of 4.8%; HRMS  $m/z$   $[M+H]^+$  found 2904.6829 (calcd. for  $C_{132}H_{219}N_{42}O_{32}$  2904.6801); HPLC purity 98.2% ( $t_R = 19.07$  min) (column 3).

**S28s:** Yield of 28%; HRMS  $m/z$   $[M+H]^+$  found 2884.7090 (calcd. for  $C_{130}H_{223}N_{42}O_{32}$  2884.7114); HPLC purity 98.8% ( $t_R = 18.20$  min) (column 3).

**R29r:** Yield of 21%; HRMS  $m/z$   $[M+H]^+$  found 2884.7119 (calcd. for  $C_{130}H_{223}N_{42}O_{32}$  2884.7114); HPLC purity 98.8% ( $t_R = 18.35$  min) (column 3).

**I30i:** Yield of 18%; HRMS  $m/z$   $[M+H]^+$  found 2884.7126 (calcd. for  $C_{130}H_{223}N_{42}O_{32}$  2884.7114); HPLC purity 99.7% ( $t_R = 16.20$  min) (column 3).

**E31e:** Yield of 21%; HRMS  $m/z$   $[M+H]^+$  found 2884.7109 (calcd. for  $C_{130}H_{223}N_{42}O_{32}$  2884.7114); HPLC purity 97.2% ( $t_R = 17.95$  min) (column 3).

**A32a:** Yield of 30%; HRMS  $m/z$   $[M+H]^+$  found 2884.7129 (calcd. for  $C_{130}H_{223}N_{42}O_{32}$  2884.7114); HPLC purity 99.6% ( $t_R = 16.68$  min) (column 3).

**I33i:** Yield of 26%; HRMS  $m/z$   $[M+H]^+$  found 2884.7122 (calcd. for  $C_{130}H_{223}N_{42}O_{32}$  2884.7114); HPLC purity 99.1% ( $t_R = 15.14$  min) (column 3).

**K34k:** Yield of 27%; HRMS  $m/z$   $[M+H]^+$  found 2884.7085 (calcd. for  $C_{130}H_{223}N_{42}O_{32}$  2884.7114); HPLC purity 98.4% ( $t_R = 14.15$  min) (column 3).

**I35i:** Yield of 17%; HRMS  $m/z$   $[M+H]^+$  found 2884.7114 (calcd. for  $C_{130}H_{223}N_{42}O_{32}$  2884.7114); HPLC purity 98.7% ( $t_R = 15.04$  min) (column 3).

**Q36q:** Yield of 42%; HRMS  $m/z$   $[M+H]^+$  found 2884.7065 (calcd. for  $C_{130}H_{223}N_{42}O_{32}$  2884.7114); HPLC purity 100% ( $t_R$  = 18.32 min) (column 3).

**I37i:** Yield of 28%; HRMS  $m/z$   $[M+H]^+$  found 2884.7124 (calcd. for  $C_{130}H_{223}N_{42}O_{32}$  2884.7114); HPLC purity 99.3% ( $t_R$  = 16.14 min) (column 3).

**L38l:** Yield of 45%; HRMS  $m/z$   $[M+H]^+$  found 2884.7112 (calcd. for  $C_{130}H_{223}N_{42}O_{32}$  2884.7114); HPLC purity 99.9% ( $t_R$  = 22.60 min) (column 1).

**S39s:** Yield of 39%; HRMS  $m/z$   $[M+H]^+$  found 2884.7117 (calcd. for  $C_{130}H_{223}N_{42}O_{32}$  2884.7114); HPLC purity 99.6% ( $t_R$  = 15.98 min) (column 3).

**K40k:** Yield of 31%; HRMS  $m/z$   $[M+H]^+$  found 2884.7114 (calcd. for  $C_{130}H_{223}N_{42}O_{32}$  2884.7114); HPLC purity 96.9% ( $t_R$  = 15.24 min) (column 3).

**L41l:** Yield of 34%; HRMS  $m/z$   $[M+H]^+$  found 2884.7129 (calcd. for  $C_{130}H_{223}N_{42}O_{32}$  2884.7114); HPLC purity 99.6% ( $t_R$  = 14.71 min) (column 3).

**R42r:** Yield of 18%; HRMS  $m/z$   $[M+H]^+$  found 2884.7092 (calcd. for  $C_{130}H_{223}N_{42}O_{32}$  2884.7114); HPLC purity 98.6% ( $t_R$  = 21.23 min) (column 3).

**L43l:** Yield of 42%; HRMS  $m/z$   $[M+H]^+$  found 2884.7090 (calcd. for  $C_{130}H_{223}N_{42}O_{32}$  2884.7114); HPLC purity 97.6% ( $t_R$  = 19.48 min) (column 3).

### ***3. Luciferase reporter assay***

As previously reported,<sup>19–21</sup> HEK293 cells were subcultured in DMEM containing 10% FBS and nonessential amino acids at 37 °C under 5% CO<sub>2</sub>. The cells were seeded at  $2.0 \times 10^4$  cells per well in the 96-well plates. After incubation for 24 h, transfection of reporter (pGL4.48[luc2P/SBE/Hygro]) and control (pGL4.74[hRluc/-TK]) plasmids was carried out using FuGENE HD. After 24 h of transfection, the culture medium was exchanged to serum-free DMEM for 8 h starvation. Respective synthesized peptides were dissolved in H<sub>2</sub>O, diluted by addition of DMEM containing recombinant human/mouse/rat myostatin to a final concentration of 8 ng/mL (0.32 nM), and incubated for 20 min at rt. Cells were treated with a peptide solution and incubated for 4 h at 37 °C under 5% CO<sub>2</sub>, and then washed with PBS. The preparation of cell lysates and the measurement of the luciferase reporter activities were conducted according to manufacturer's protocol of a Dual-Luciferase Reporter Assay System (Promega). Mouse myostatin-derived recombinant propeptide (prodomain) was used as a positive control and underwent the same manipulation arriving at a final concentration of 10 nM. Each experiment was carried out in triplicate. Values represent means  $\pm$  SD ( $n=3$ ). To determine IC<sub>50</sub> values, the peptide derivatives were dissolved at concentrations of 0.016–2  $\mu$ M and the inhibitory activities of peptides were determined in triplicate at each concentration. Curve fitting was performed using KaleidaGraph 4.5.

### ***4. Measurement of circular dichroic spectra***

As previously reported,<sup>18,24</sup> circular dichroic (CD) spectra of peptides were obtained at 25 °C using a Jasco J-1500 CD spectrometer (JASCO, Japan) in a quartz cell with a 0.5-cm path length. Briefly, peptides with a final concentration of 5 μM were prepared in 20 mM sodium phosphate buffer (pH 7.4) containing 10% 2,2,2-trifluoroethanol. All spectra were collected between 190–250 nm with a scan speed of 100 nm/min, a response time of 1 s, and a bandwidth of 1 nm. The baseline scan, which was acquired by measuring the buffer alone, was subtracted from the experimental readings. CD data, which were collected every 0.1 nm, were the average of nine scans. The normalized CD data was expressed in the mean residue ellipticity (deg·cm<sup>2</sup>/dmol) and plotted as functions of wavelength. Obtained CD spectra were analyzed by using Jasco secondary estimation software with Reed's reference set as reference spectra.

### ***5. Intramuscular administration of peptides into anterior tibialis of mdx mice***

Animal studies were approved by the Animal Research Committee of Tokyo University of Pharmacy and Life Sciences. The peptide solution (0.75 mM peptide **E31R** or **8a** in saline, 40 μL) and a saline (control, 40 μL) were intramuscularly injected into left and right tibialis anterior or gastrocnemius muscle of 5-week-old *mdx* or C57BL/6 mice, respectively (at day 0). At day 14), the treatment was repeated for the same muscle. Then at day 42, the muscles were collected and weighed. Statistical analysis was performed using a Student's *t*-test.

### ***6. Histological analysis***

The treated gastrocnemius muscles were dissected 28 days after the 2nd injection of **E31R** or at day 14 for the saline-treated animals. The frozen tissue sections were prepared transversely (6 μm) using a cryostat, and then hematoxylin and eosin staining was performed on each section. Fiber sizes were determined by measuring the area of each myofiber in a fixed area. Two hundred cross-sectioned myofibers were randomly selected from 3 fields of each tissue section.

### ***7. Measurement of grip strength in mdx mice***

Animal studies were approved by the Animal Research Committee of Tokyo University of Pharmacy and Life Sciences. The peptide solution in saline (0.75 mM peptide **8a**, 40 μL) were intramuscularly injected into respective four points per leg in 5-week-old *mdx* mice (at day 0) (n = 4). After two weeks (at day 14), the treatment was repeated. As a control, saline (40 μL) was similarly treated in another group of *mdx* mice (n = 4). Then four weeks after the last treatment (at day 42), the grip strength of mice treated with peptide **8a** or with saline were measured by a grip strength meter MK-380M (Muromachi, Tokyo, Japan). Data normalized with body weight were presented as mean values ± SD. Statistical analysis was performed using a Student's *t*-test.

## Analytical HPLC chromatograms

peptide 4a:

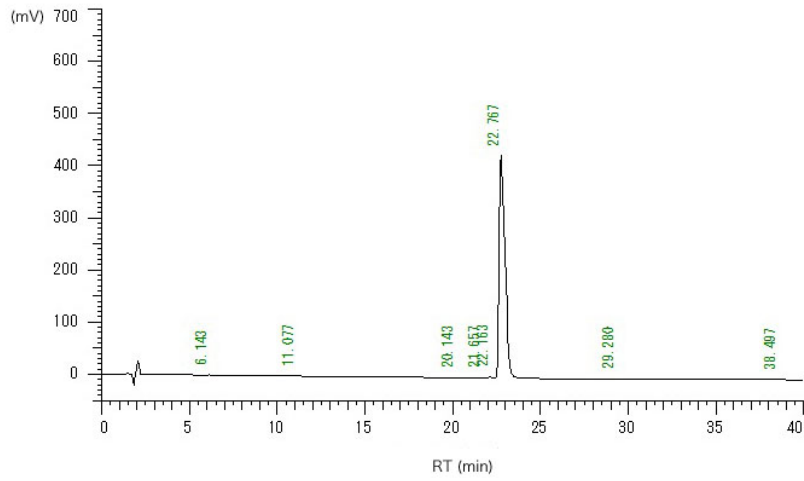

| NO | RT     | AREA    | CONC   | BC |
|----|--------|---------|--------|----|
| 1  | 6.143  | 681     | 0.008  | BB |
| 2  | 11.077 | 610     | 0.007  | BB |
| 3  | 20.143 | 1071    | 0.012  | BB |
| 4  | 21.657 | 730     | 0.008  | BB |
| 5  | 22.163 | 8986    | 0.103  | BB |
| 6  | 22.767 | 8671678 | 99.755 | BB |
| 7  | 29.28  | 2475    | 0.028  | BB |
| 8  | 38.497 | 6750    | 0.078  | BB |
|    |        | 8692981 | 100    |    |

peptide 4b:

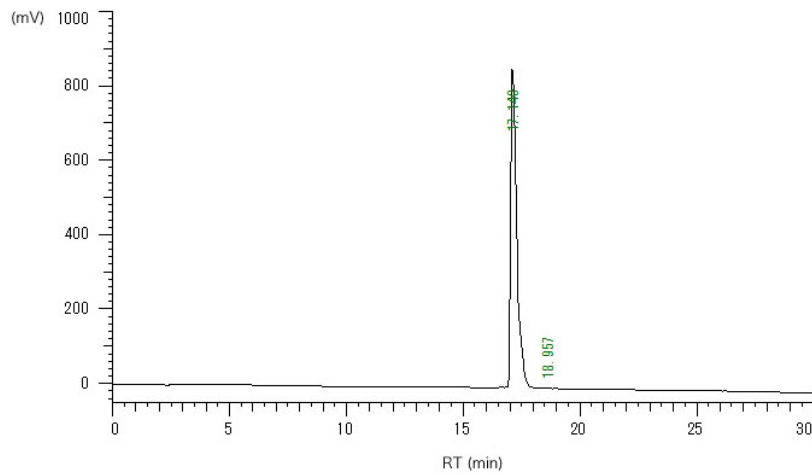

| NO | RT     | AREA     | CONC   | BC |
|----|--------|----------|--------|----|
| 1  | 17.14  | 13875882 | 99.975 | BB |
| 2  | 18.957 | 3499     | 0.025  | BB |
|    |        | 13879381 | 100    |    |

peptide 5:

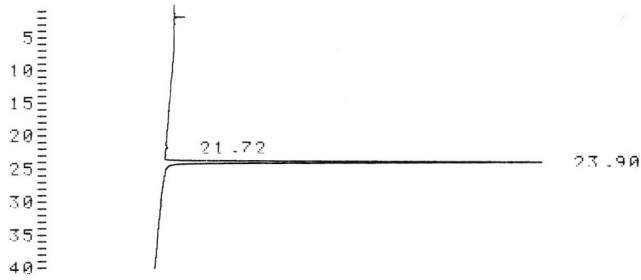

D-2500

METHOD: TAG: 177 CH: 1

FILE: 0 CALC-METHOD: AREA% TABLE: 0 CONC:

| NO.        | RT    | AREA    | CONC    | BC |
|------------|-------|---------|---------|----|
| 2          | 23.90 | 1838911 | 100.000 | BB |
| TOTAL      |       | 1838911 | 100.000 |    |
| PEAK REJ : |       | 10000   |         |    |

peptide 6:

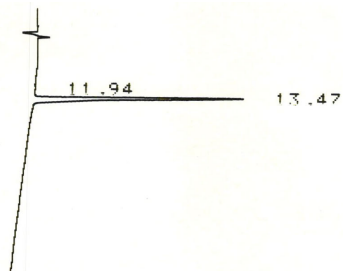

D-2500

METHOD: TAG: 8 CH: 1

FILE: 0 CALC-METHOD: AREA% TABLE: 0 CONC:

| NO.        | RT    | AREA    | CONC    | BC |
|------------|-------|---------|---------|----|
| 1          | 11.94 | 15042   | 0.900   | BU |
| 2          | 13.47 | 1657020 | 99.100  | UB |
| TOTAL      |       | 1672062 | 100.000 |    |
| PEAK REJ : |       | 10000   |         |    |



### E31K:

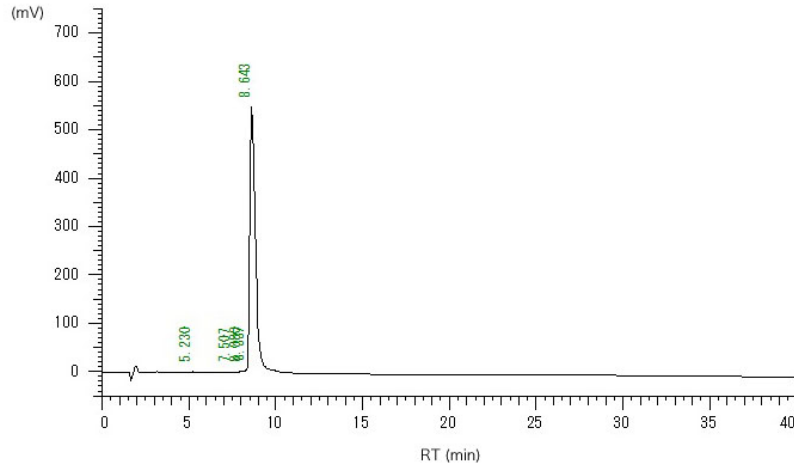

| NO | RT    | AREA     | CONC   | BC |
|----|-------|----------|--------|----|
| 1  | 5.23  | 9345     | 0.085  | BB |
| 2  | 7.507 | 2207     | 0.02   | BB |
| 3  | 8.08  | 11957    | 0.109  | BV |
| 4  | 8.337 | 30010    | 0.274  | VV |
| 5  | 8.643 | 10915754 | 99.512 | VB |
|    |       | 10969273 | 100    |    |

### E31R:

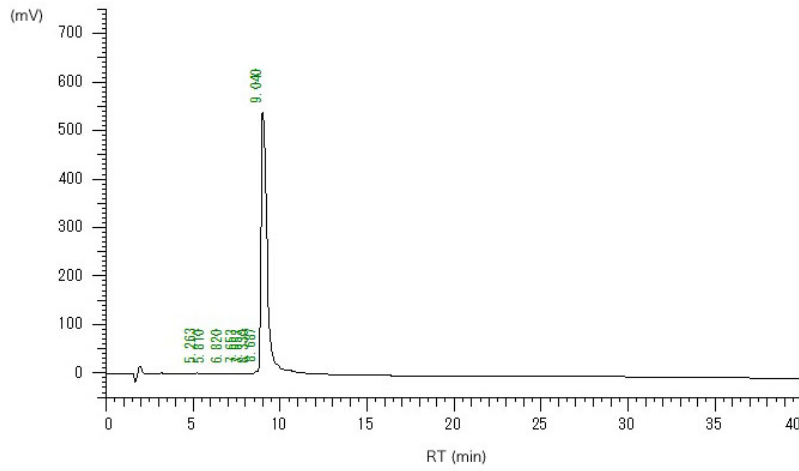

| NO | RT    | AREA     | CONC   | BC |
|----|-------|----------|--------|----|
| 1  | 5.263 | 20810    | 0.188  | BB |
| 2  | 5.81  | 975      | 0.009  | BB |
| 3  | 6.82  | 8670     | 0.078  | BB |
| 4  | 7.653 | 6522     | 0.059  | BB |
| 5  | 7.957 | 914      | 0.008  | BB |
| 6  | 8.33  | 5216     | 0.047  | BB |
| 7  | 8.687 | 28646    | 0.258  | BV |
| 8  | 9.04  | 11023994 | 99.353 | VB |
|    |       | 11095747 | 100    |    |

### E31N:

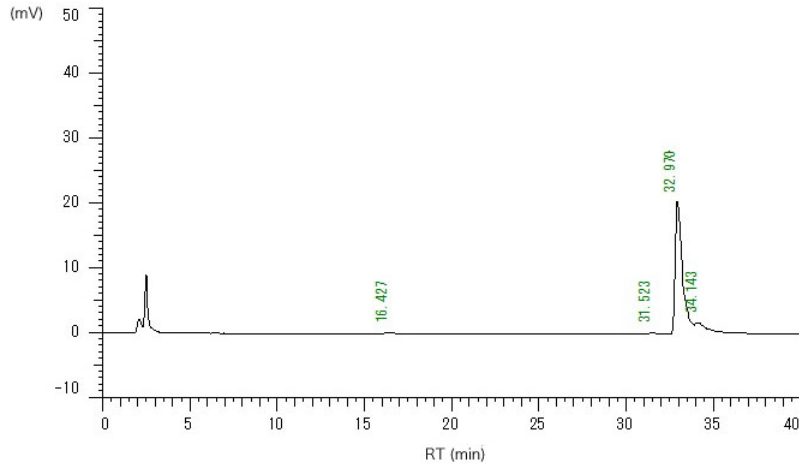

| NO | RT     | AREA   | CONC   | BC  |
|----|--------|--------|--------|-----|
| 1  | 16.427 | 1341   | 0.25   | BB  |
| 2  | 31.523 | 503    | 0.094  | BB  |
| 3  | 32.97  | 524444 | 97.675 | BV  |
| 4  | 34.143 | 10639  | 1.982  | TBB |
|    |        | 536927 | 100    |     |

### E31Q:

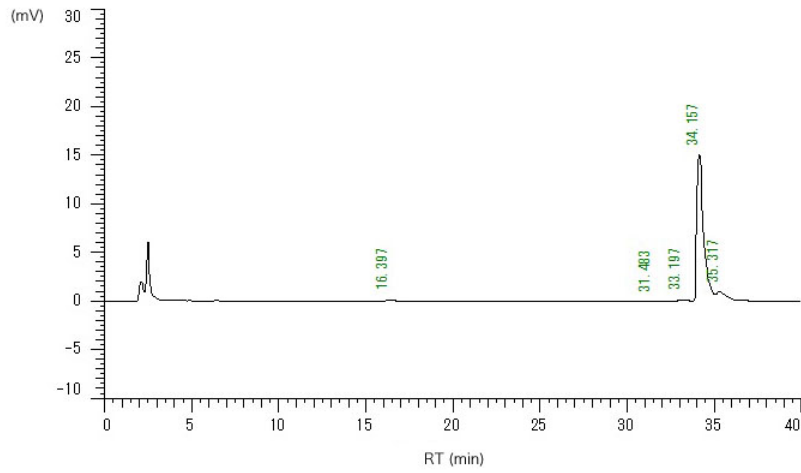

| NO | RT     | AREA   | CONC   | BC |
|----|--------|--------|--------|----|
| 1  | 16.397 | 1177   | 0.332  | BB |
| 2  | 31.483 | 1087   | 0.306  | BB |
| 3  | 33.197 | 910    | 0.256  | BB |
| 4  | 34.157 | 344270 | 96.947 | BV |
| 5  | 35.317 | 7667   | 2.159  | VB |
|    |        | 355111 | 100    |    |

peptide 7a:

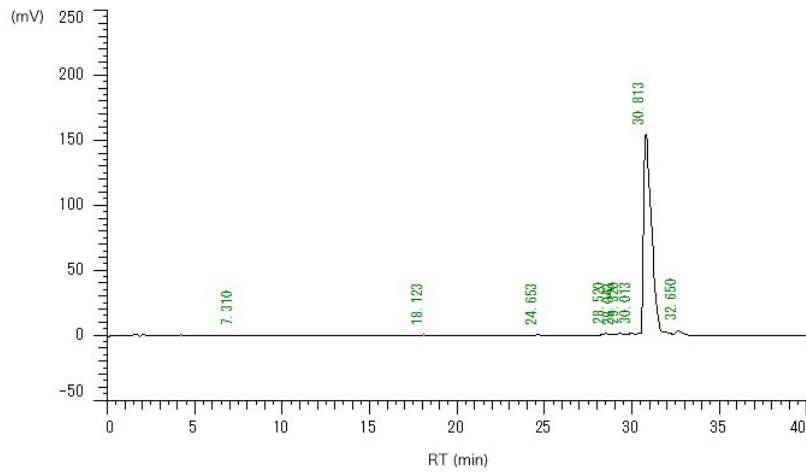

| NO | RT     | AREA    | CONC   | BC |
|----|--------|---------|--------|----|
| 1  | 7.31   | 1772    | 0.043  | BB |
| 2  | 18.123 | 3212    | 0.077  | BB |
| 3  | 24.653 | 4817    | 0.116  | BB |
| 4  | 28.52  | 8691    | 0.209  | BB |
| 5  | 29.043 | 2121    | 0.051  | BB |
| 6  | 29.32  | 3730    | 0.09   | BB |
| 7  | 30.013 | 5475    | 0.132  | BB |
| 8  | 30.813 | 4096758 | 98.514 | BB |
| 9  | 32.65  | 31966   | 0.769  | BB |
|    |        | 4158542 | 100    |    |

peptide 7b:

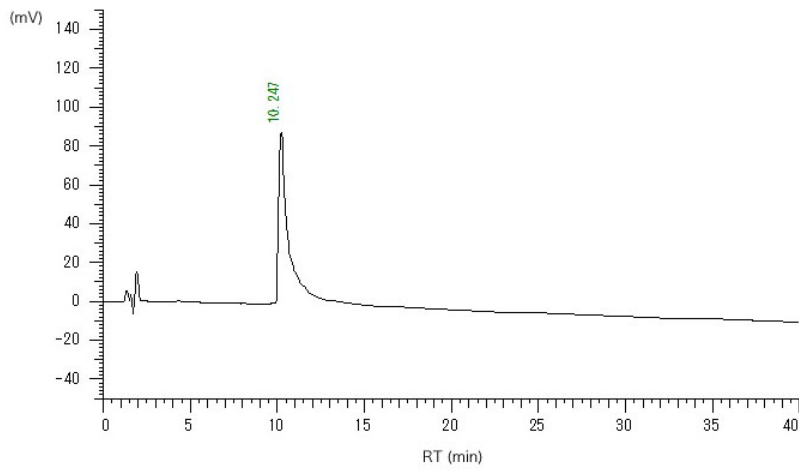

| NO | RT     | AREA    | CONC | BC |
|----|--------|---------|------|----|
| 1  | 10.247 | 2770502 | 100  | BB |
|    |        | 2770502 | 100  |    |

peptide 7c:

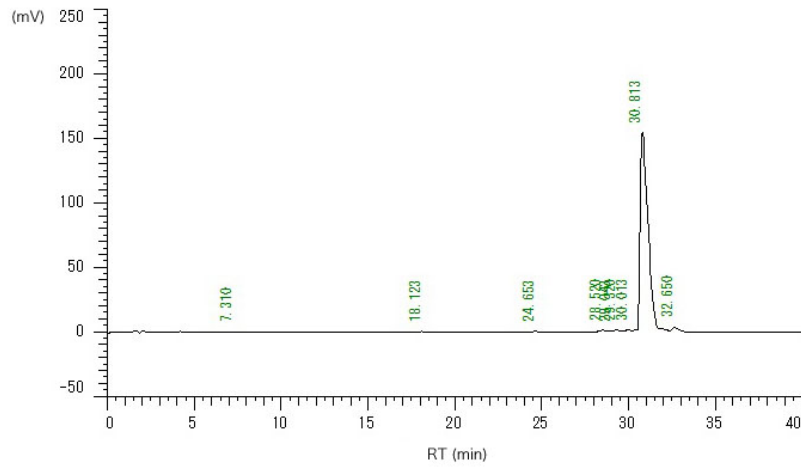

| NO | RT     | AREA    | CONC   | BC  |
|----|--------|---------|--------|-----|
| 1  | 7.31   | 1772    | 0.043  | BB  |
| 2  | 18.123 | 3212    | 0.077  | BB  |
| 3  | 24.653 | 4817    | 0.116  | BB  |
| 4  | 28.52  | 8691    | 0.209  | BB  |
| 5  | 29.043 | 2121    | 0.051  | BB  |
| 6  | 29.32  | 3730    | 0.09   | BB  |
| 7  | 30.013 | 5475    | 0.132  | BB  |
| 8  | 30.813 | 4096758 | 98.514 | BB  |
| 9  | 32.65  | 31966   | 0.769  | BB  |
|    |        | 4158542 |        | 100 |

peptide 7d:

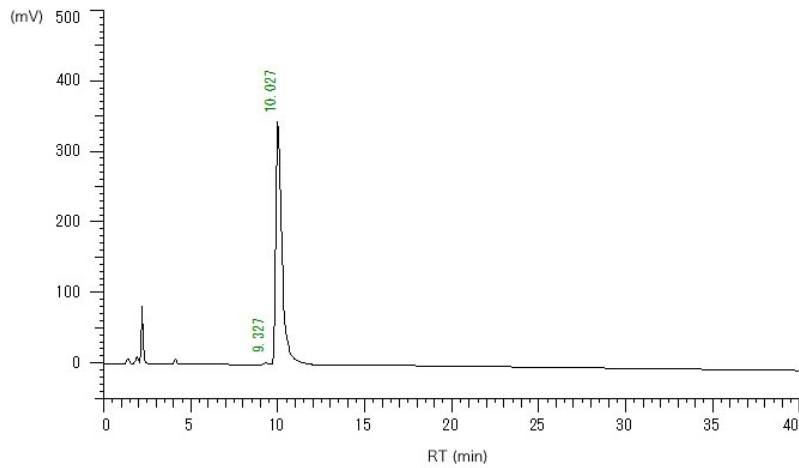

| NO | RT     | AREA    | CONC   | BC  |
|----|--------|---------|--------|-----|
| 1  | 9.327  | 24822   | 0.333  | BB  |
| 2  | 10.027 | 7421475 | 99.667 | BB  |
|    |        | 7446297 |        | 100 |

peptide 7e:

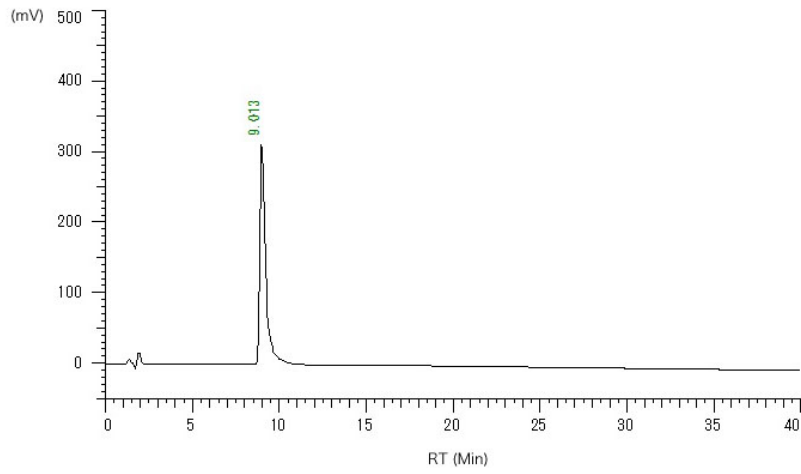

| NO | RT    | AREA    | CONC | BC |
|----|-------|---------|------|----|
| 1  | 9.013 | 6365911 | 100  | BB |
|    |       | 6365911 | 100  |    |

peptide 8a:

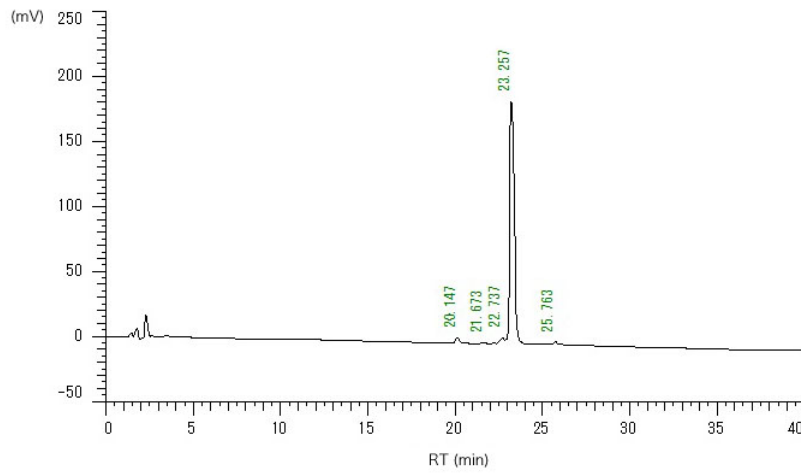

| NO | RT     | AREA    | CONC   | BC |
|----|--------|---------|--------|----|
| 1  | 20.147 | 46521   | 1.611  | BB |
| 2  | 21.673 | 1769    | 0.061  | BB |
| 3  | 22.737 | 53356   | 1.847  | BV |
| 4  | 23.257 | 2755097 | 95.398 | VB |
| 5  | 25.763 | 31271   | 1.083  | BB |
|    |        | 2888014 | 100    |    |

peptide 8b:

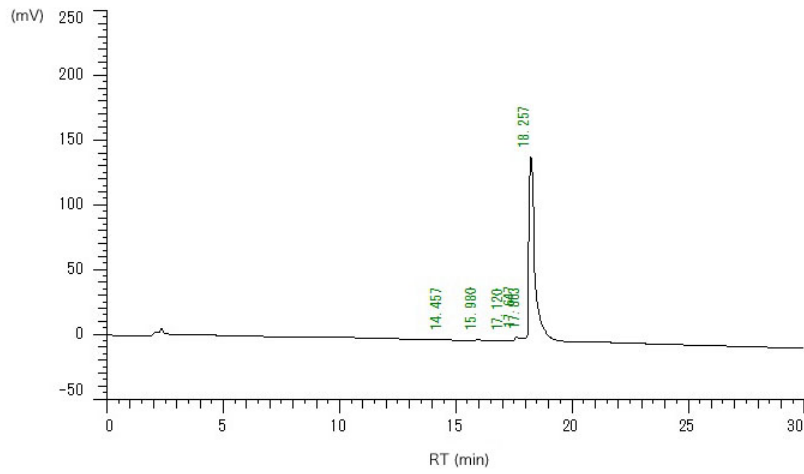

| NO | RT     | AREA    | CONC   | BC |
|----|--------|---------|--------|----|
| 1  | 14.457 | 1063    | 0.05   | BB |
| 2  | 15.98  | 2633    | 0.124  | BB |
| 3  | 17.12  | 5696    | 0.268  | BB |
| 4  | 17.647 | 20520   | 0.966  | BV |
| 5  | 17.863 | 18917   | 0.891  | VV |
| 6  | 18.257 | 2074787 | 97.701 | VB |
|    |        | 2123616 | 100    |    |

peptide 8c:

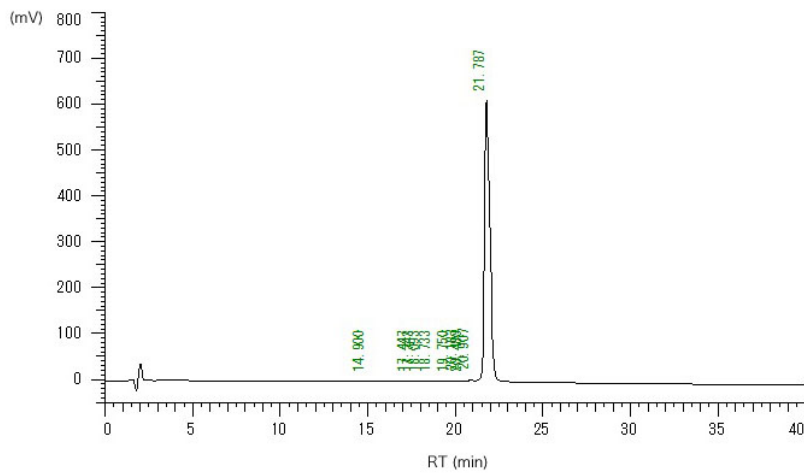

| NO | RT     | AREA     | CONC   | BC |
|----|--------|----------|--------|----|
| 1  | 14.9   | 3022     | 0.026  | BB |
| 2  | 17.447 | 1465     | 0.013  | BB |
| 3  | 17.743 | 1718     | 0.015  | BB |
| 4  | 18.093 | 2251     | 0.019  | BB |
| 5  | 18.733 | 6200     | 0.053  | BB |
| 6  | 19.75  | 16183    | 0.138  | BV |
| 7  | 20.183 | 29914    | 0.255  | VV |
| 8  | 20.48  | 10418    | 0.089  | VV |
| 9  | 20.907 | 69622    | 0.594  | VV |
| 10 | 21.787 | 11585305 | 98.799 | VB |
|    |        | 11726098 | 100    |    |

**I30Chg:**

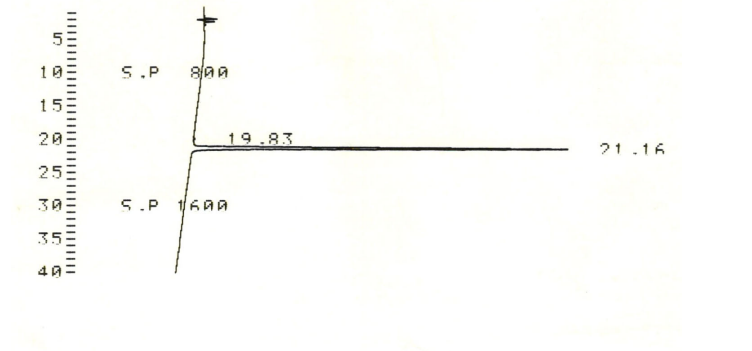

D-2500

METHOD: TAG: 546 CH: 1  
 FILE: 0 CALC-METHOD: AREA% TABLE: 0 CONC:  

| NO.   | RT    | AREA    | CONC    | BC |
|-------|-------|---------|---------|----|
| 2     | 21.16 | 1914512 | 100.000 | BB |
| TOTAL |       | 1914512 | 100.000 |    |

 PEAK REJ : 10000

**I33Chg:**

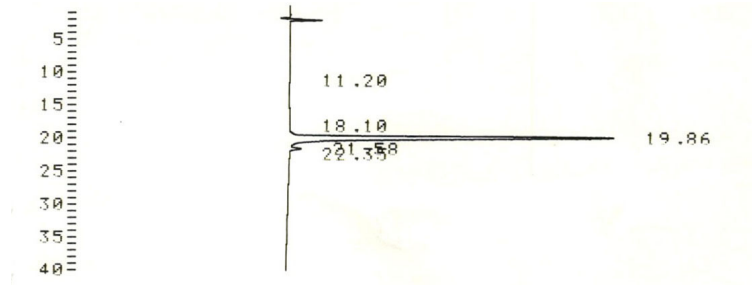

D-2500

METHOD: TAG: 1031 CH: 1  
 FILE: 0 CALC-METHOD: AREA% TABLE: 0 CONC: AREA  

| NO.   | RT    | AREA     | CONC    | BC  |
|-------|-------|----------|---------|-----|
| 6     | 11.20 | 24521    | 0.200   | BB  |
| 8     | 18.10 | 15762    | 0.129   | BU  |
| 9     | 19.86 | 11940908 | 97.560  | UU  |
| 10    | 21.58 | 237600   | 1.941   | TBB |
| 11    | 22.35 | 20732    | 0.169   | TBB |
| TOTAL |       | 12239523 | 100.000 |     |

 PEAK REJ : 10000

**I35Chg:**

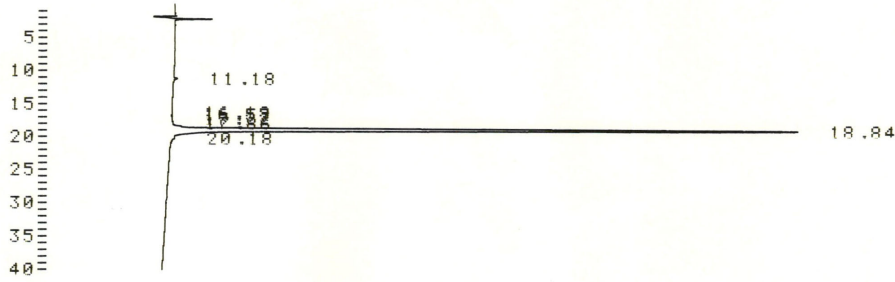

D-2500

METHOD: TAG: 796 CH: 1

FILE: 0 CALC-METHOD: AREA% TABLE: 0 CONC: AREA

| NO.        | RT    | AREA    | CONC    | BC |
|------------|-------|---------|---------|----|
| 5          | 11.18 | 39355   | 0.431   | BB |
| 8          | 17.22 | 11268   | 0.123   | UU |
| 9          | 17.86 | 25669   | 0.281   | UU |
| 10         | 18.84 | 9064325 | 99.165  | UU |
| TOTAL      |       | 9140617 | 100.000 |    |
| PEAK REJ : |       | 10000   |         |    |

**I37Chg:**

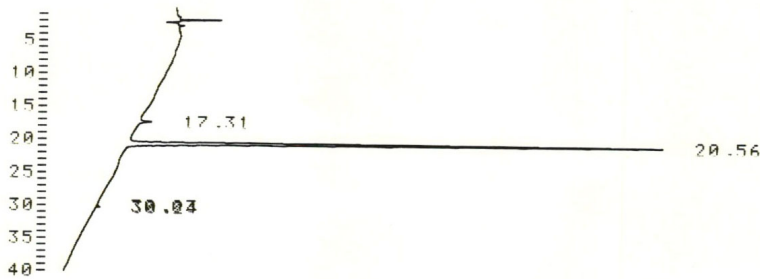

D-2500

METHOD: TAG: 807 CH: 1

FILE: 0 CALC-METHOD: AREA% TABLE: 0 CONC: AREA

| NO.        | RT    | AREA   | CONC    | BC |
|------------|-------|--------|---------|----|
| 1          | 17.31 | 14852  | 2.128   | BB |
| 2          | 20.56 | 683182 | 97.872  | BB |
| TOTAL      |       | 698034 | 100.000 |    |
| PEAK REJ : |       | 10000  |         |    |



**I30Phg:**

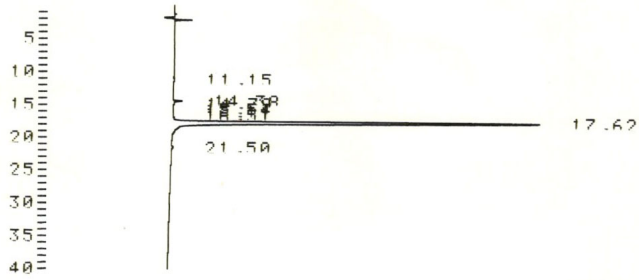

D-2500

METHOD: TAG: 794 CH: 1

FILE: 0 CALC-METHOD: AREA% TABLE: 0 CONC:

| NO. | RT    | AREA     | CONC   | BC  |
|-----|-------|----------|--------|-----|
| 6   | 11.15 | 27354    | 0.244  | BB  |
| 7   | 14.38 | 167171   | 1.491  | BU  |
| 8   | 14.79 | 10946    | 0.098  | TBB |
| 11  | 16.51 | 20138    | 0.180  | UU  |
| 12  | 17.62 | 10948278 | 97.639 | UU  |
| 13  | 21.50 | 39152    | 0.349  | TBB |

TOTAL 11213039 100.000

PEAK REJ : 10000

**I33Phg:**

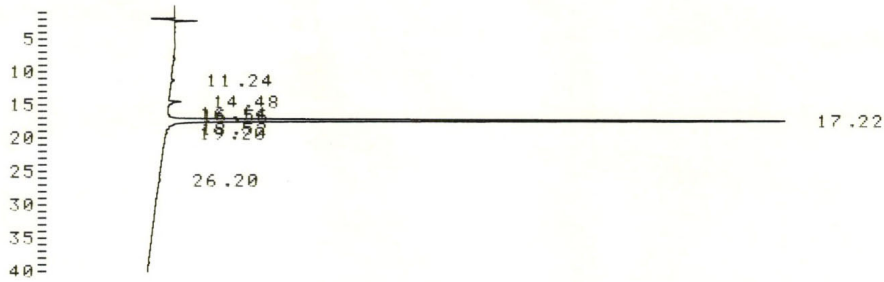

D-2500

METHOD: TAG: 805 CH: 1

FILE: 0 CALC-METHOD: AREA% TABLE: 0 CONC: AREA

| NO. | RT    | AREA    | CONC   | BC |
|-----|-------|---------|--------|----|
| 5   | 11.24 | 30964   | 0.891  | UU |
| 6   | 14.48 | 75068   | 2.160  | UU |
| 8   | 16.56 | 14053   | 0.404  | UU |
| 9   | 17.22 | 3345573 | 96.251 | UU |
| 12  | 26.20 | 10212   | 0.294  | BB |

TOTAL 3475870 100.000

PEAK REJ : 10000

**I35Phg:**

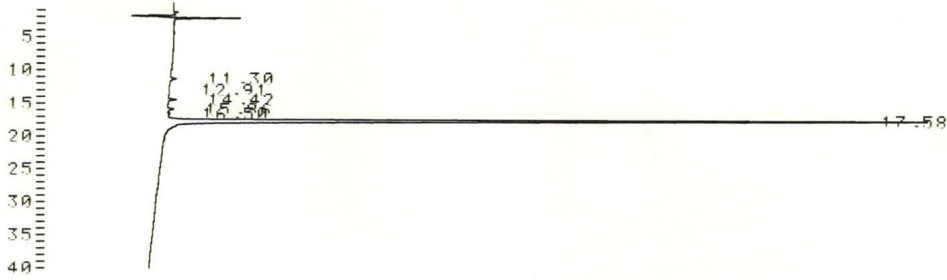

D-2500

METHOD: TAG: 771 CH: 1  
FILE: 0 CALC-METHOD: AREA% TABLE: 0 CONC: AREA

| NO.   | RT    | AREA    | CONC    | BC |
|-------|-------|---------|---------|----|
| 6     | 11.30 | 32355   | 0.660   | BB |
| 8     | 14.42 | 41568   | 0.849   | UU |
| 9     | 15.86 | 44308   | 0.904   | UU |
| 10    | 16.50 | 16469   | 0.336   | UU |
| 11    | 17.58 | 4764149 | 97.250  | UB |
| TOTAL |       | 4898849 | 100.000 |    |

PEAK REJ : 10000

**I37Phg:**

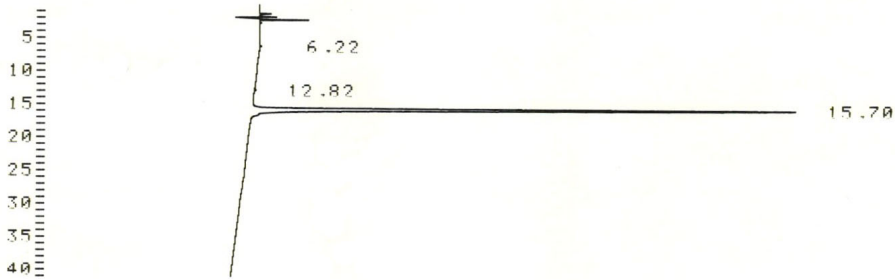

D-2500

METHOD: TAG: 1001 CH: 1  
FILE: 0 CALC-METHOD: AREA% TABLE: 0 CONC: AREA

| NO.   | RT    | AREA    | CONC    | BC |
|-------|-------|---------|---------|----|
| 3     | 15.70 | 3145378 | 100.000 | UB |
| TOTAL |       | 3145378 | 100.000 |    |

PEAK REJ : 10000

**L38Chg:**

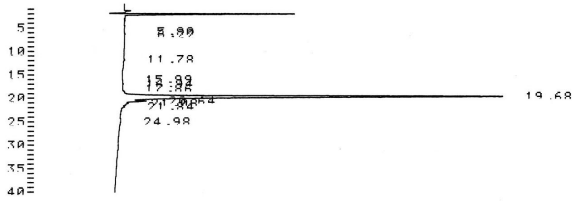

D-2500

METHOD: TAG: 18 CH: 1

FILE: 0 CALC-METHOD: AREA% TABLE: 0 CONC: AREA

| NO. | RT    | AREA    | CONC   | RC  |
|-----|-------|---------|--------|-----|
| 2   | 6.22  | 25403   | 0.267  | UU  |
| 3   | 11.78 | 27257   | 0.286  | UB  |
| 5   | 16.94 | 27988   | 0.294  | UU  |
| 6   | 17.86 | 11029   | 0.116  | UU  |
| 7   | 19.68 | 9184139 | 96.428 | UU  |
| 8   | 20.64 | 155041  | 1.628  | TBB |
| 9   | 21.88 | 35572   | 0.373  | TBB |
| 10  | 21.84 | 20252   | 0.213  | TBB |
| 11  | 24.98 | 37700   | 0.396  | TBB |

TOTAL

9524381 100.000

PEAK RET : 10000

**L41Chg:**

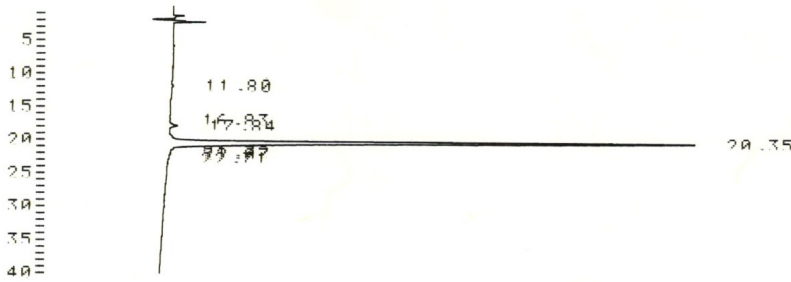

D-2500

METHOD: TAG: 20 CH: 1

FILE: 0 CALC-METHOD: AREA% TABLE: 0 CONC: AREA

| NO. | RT    | AREA    | CONC   | RC |
|-----|-------|---------|--------|----|
| 6   | 11.80 | 26192   | 0.313  | BB |
| 8   | 17.84 | 119397  | 1.429  | BU |
| 9   | 20.35 | 8212149 | 98.258 | UU |

TOTAL

8357738 100.000

PEAK RET : 10000

**L43Chg:**

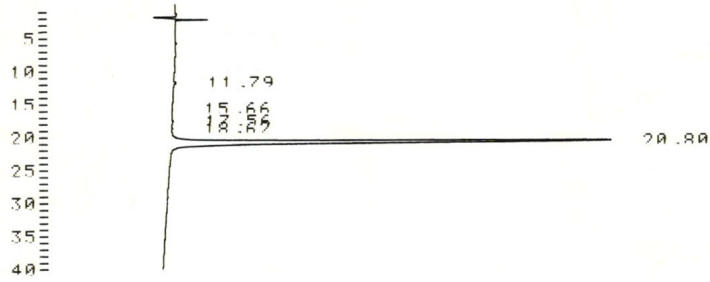

D-2500

METHOD: TAG: 28 CH: 1

FILE: 0 CALC-METHOD: AREA% TABLE: 0 CONC: AREA

| NO.        | RT    | AREA    | CONC    | RC |
|------------|-------|---------|---------|----|
| 5          | 11.79 | 1245.37 | 0.463   | RR |
| 7          | 17.56 | 24581   | 0.329   | RU |
| 8          | 18.62 | 11881   | 0.159   | UU |
| 9          | 20.80 | 7389585 | 99.048  | UU |
| TOTAL      |       | 7460584 | 100.000 |    |
| PEAK RET : |       | 10000   |         |    |

**L38Phg:**

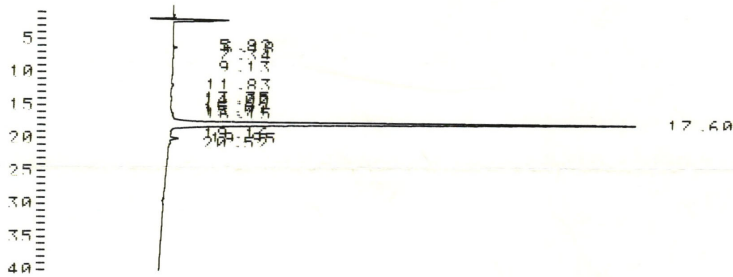

D-2500

METHOD: TAG: 19 CH: 1

FILE: 0 CALC-METHOD: AREA% TABLE: 0 CONC: AREA

| NO.        | RT    | AREA    | CONC    | RC  |
|------------|-------|---------|---------|-----|
| 2          | 6.18  | 61621   | 0.845   | UU  |
| 5          | 11.83 | 34365   | 0.471   | UR  |
| 7          | 14.00 | 18012   | 0.247   | UU  |
| 9          | 15.71 | 19490   | 0.267   | UU  |
| 10         | 16.15 | 50348   | 0.690   | UU  |
| 11         | 17.60 | 6975954 | 95.634  | UU  |
| 13         | 19.95 | 109772  | 1.505   | TRU |
| 14         | 20.52 | 24893   | 0.341   | TUR |
| TOTAL      |       | 7294455 | 100.000 |     |
| PEAK RET : |       | 10000   |         |     |

**L41Phg:**

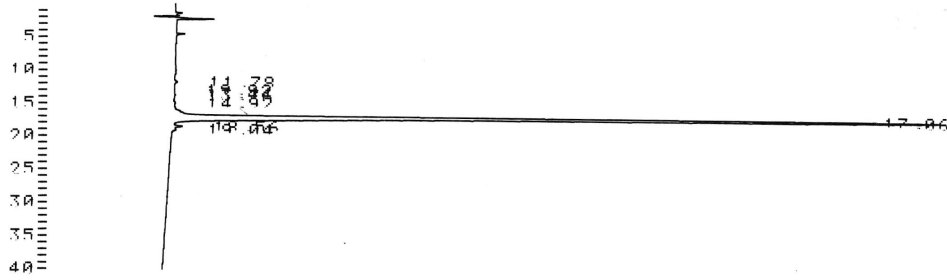

D-2500

METHOD: TAG: 26 CH: 1

FILE: 0 CALC-METHOD: AREA% TABLE: 0 CONC: AREA

| NO.        | RT    | AREA     | CONC    | RC  |
|------------|-------|----------|---------|-----|
| 4          | 11.78 | 52153    | 0.408   | BU  |
| 7          | 13.76 | 24239    | 0.189   | UU  |
| 8          | 14.92 | 41853    | 0.327   | UU  |
| 9          | 17.06 | 12534396 | 97.976  | UU  |
| 10         | 18.56 | 97944    | 0.766   | TBU |
| 11         | 19.04 | 42753    | 0.334   | TUR |
| TOTAL      |       | 12793338 | 100.000 |     |
| PEAK RET : |       | 10000    |         |     |

**L43Phg:**

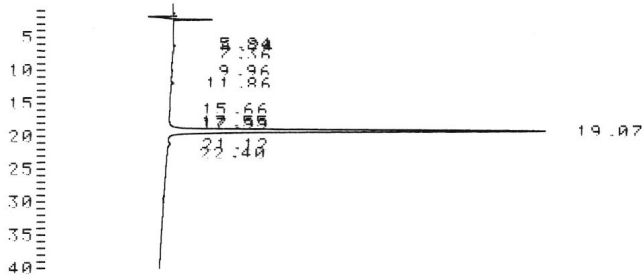

D-2500

METHOD: TAG: 29 CH: 1

FILE: 0 CALC-METHOD: AREA% TABLE: 0 CONC:

| NO.        | RT    | AREA    | CONC    | RC  |
|------------|-------|---------|---------|-----|
| 2          | 6.24  | 21914   | 0.405   | UUU |
| 5          | 11.06 | 24108   | 0.445   | RR  |
| 8          | 17.99 | 17672   | 0.326   | UUU |
| 9          | 19.07 | 5319002 | 98.241  | UUU |
| 10         | 21.12 | 31567   | 0.583   | TBR |
| TOTAL      |       | 5414263 | 100.000 |     |
| PEAK RET : |       | 10000   |         |     |

**S28s:**

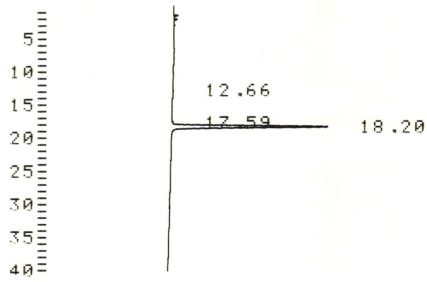

D-2500

METHOD: TAG: 177 CH: 1  
 FILE: 0 CALC-METHOD: AREA% TABLE: 0 CONC:  

| NO.   | RT    | AREA    | CONC    | BC |
|-------|-------|---------|---------|----|
| 3     | 12.66 | 25926   | 0.621   | BU |
| 4     | 17.59 | 25344   | 0.607   | UU |
| 5     | 18.20 | 4125004 | 98.772  | UB |
| TOTAL |       | 4176274 | 100.000 |    |

 PEAK REJ : 10000

**R29r:**

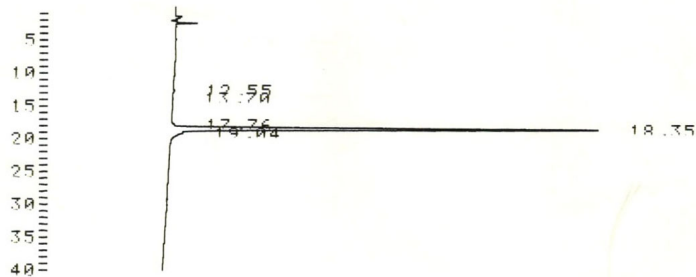

D-2500

METHOD: TAG: 186 CH: 1  
 FILE: 0 CALC-METHOD: AREA% TABLE: 0 CONC: AREA  

| NO.   | RT    | AREA    | CONC    | BC |
|-------|-------|---------|---------|----|
| 5     | 12.55 | 14298   | 0.224   | UB |
| 6     | 13.70 | 21152   | 0.331   | BU |
| 7     | 17.76 | 40817   | 0.639   | UU |
| 8     | 18.35 | 6306471 | 98.805  | UU |
| TOTAL |       | 6382738 | 100.000 |    |

 PEAK REJ : 10000

**I30i:**

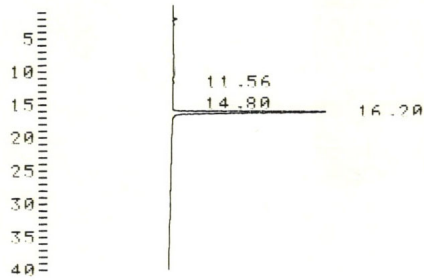

D-2500

METHOD: TAG: 254 CH: 1  
FILE: 0 CALC-METHOD: AREA% TABLE: 0 CONC:  
NO. RT AREA CONC BC  
2 11.56 11646 0.336 BB  
4 16.20 3458055 99.664 UB  
TOTAL 3469701 100.000  
PEAK RET : 10000

**E31e:**

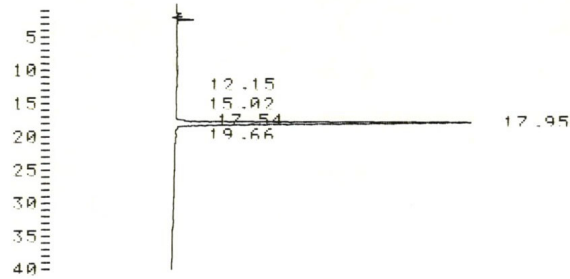

D-2500

METHOD: TAG: 255 CH: 1  
FILE: 0 CALC-METHOD: AREA% TABLE: 0 CONC:  
NO. RT AREA CONC BC  
5 12.15 21930 0.293 BB  
7 17.54 154383 2.061 BU  
8 17.95 7284248 97.242 UU  
9 19.66 30293 0.404 TB  
TOTAL 7490854 100.000  
PEAK RET : 10000

**A32a:**

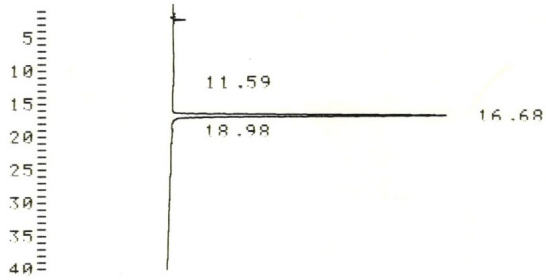

D-2500

METHOD: TAG: 136 CH: 1  
 FILE: 0 CALC-METHOD: AREA% TABLE: 0 CONC:  

| NO.   | RT    | AREA    | CONC    | BC  |
|-------|-------|---------|---------|-----|
| 2     | 11.59 | 10009   | 0.143   | BB  |
| 3     | 16.68 | 6964051 | 99.624  | BU  |
| 4     | 18.98 | 16256   | 0.233   | TBB |
| TOTAL |       | 6990316 | 100.000 |     |

 PEAK REJ : 10000

**I33i:**

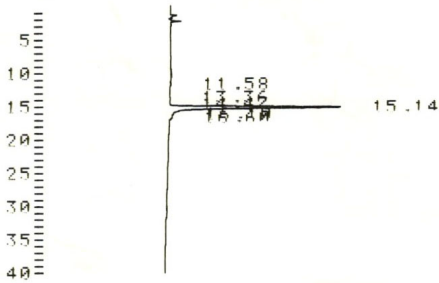

D-2500

METHOD: TAG: 146 CH: 1  
 FILE: 0 CALC-METHOD: AREA% TABLE: 0 CONC:  

| NO.   | RT    | AREA    | CONC    | BC  |
|-------|-------|---------|---------|-----|
| 3     | 11.58 | 11328   | 0.235   | BB  |
| 5     | 14.47 | 15137   | 0.315   | BU  |
| 6     | 15.14 | 4770543 | 99.133  | UU  |
| 8     | 16.60 | 15240   | 0.317   | TBB |
| TOTAL |       | 4812248 | 100.000 |     |

 PEAK REJ : 10000



**K34k:**

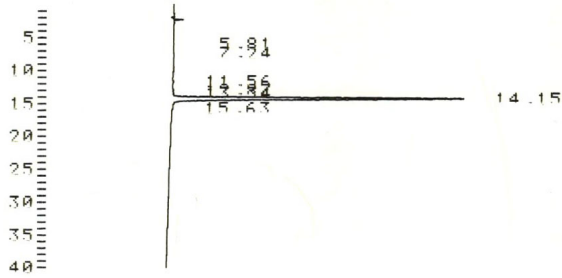

D-2500

METHOD: TAG: 147 CH: 1  
FILE: 0 CALC-METHOD: AREA% TABLE: 0 CONC:

| NO.        | RT    | AREA    | CONC    | BC |
|------------|-------|---------|---------|----|
| 2          | 7.24  | 30136   | 0.407   | UU |
| 3          | 11.56 | 29452   | 0.398   | UU |
| 4          | 12.87 | 28288   | 0.382   | UU |
| 5          | 13.34 | 33899   | 0.458   | UU |
| 6          | 14.15 | 7281137 | 98.355  | UU |
| TOTAL      |       | 7402912 | 100.000 |    |
| PEAK RET : |       | 10000   |         |    |

**I35i:**

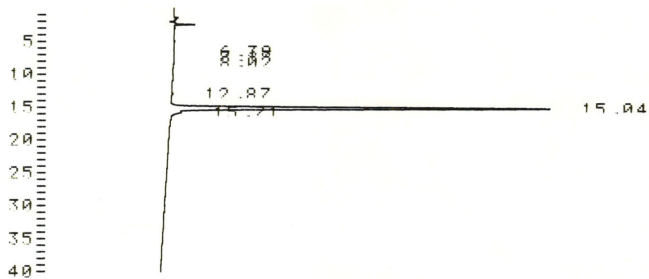

D-2500

METHOD: TAG: 181 CH: 1  
FILE: 0 CALC-METHOD: AREA% TABLE: 0 CONC:

| NO.        | RT    | AREA    | CONC    | BC  |
|------------|-------|---------|---------|-----|
| 3          | 8.02  | 14591   | 0.289   | UB  |
| 4          | 12.87 | 14302   | 0.283   | BB  |
| 5          | 15.04 | 4991129 | 98.731  | BU  |
| 6          | 15.71 | 35253   | 0.697   | TBB |
| TOTAL      |       | 5055275 | 100.000 |     |
| PEAK RET : |       | 10000   |         |     |

**Q36q:**

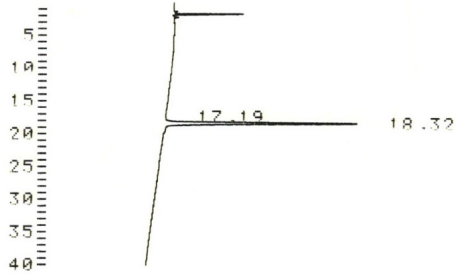

D-2500

METHOD: TAG: 118 CH: 1  
FILE: 0 CALC-METHOD: AREA% TABLE: 0 CONC:  
NO. RT AREA CONC BC  
2 18.32 1156864 100.000 UB  
TOTAL 1156864 100.000  
PEAK RET : 10000

**I37i:**

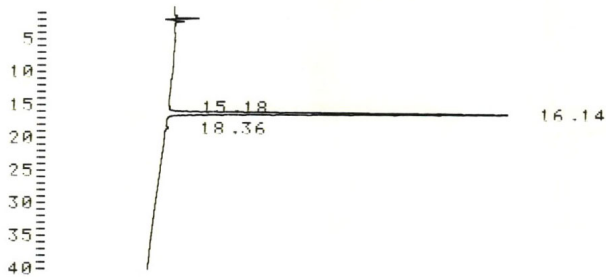

D-2500

METHOD: TAG: 119 CH: 1  
FILE: 0 CALC-METHOD: AREA% TABLE: 0 CONC:  
NO. RT AREA CONC BC  
2 16.14 1815669 99.273 UB  
3 18.36 13288 0.727 BB  
TOTAL 1828957 100.000  
PEAK RET : 10000

**L38I:**

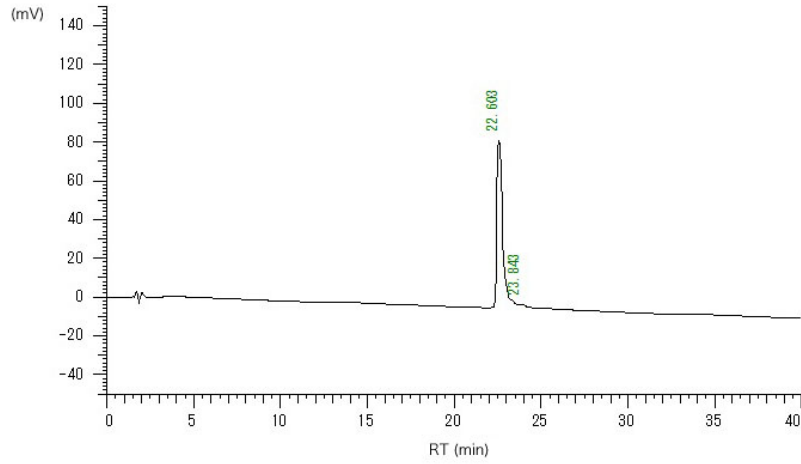

| NO | RT     | AREA    | CONC      | BC |
|----|--------|---------|-----------|----|
| 1  | 22.603 | 1660835 | 99.907 BB |    |
| 2  | 23.843 | 1543    | 0.093 BB  |    |
|    |        | 1662378 | 100       |    |

**S39s:**

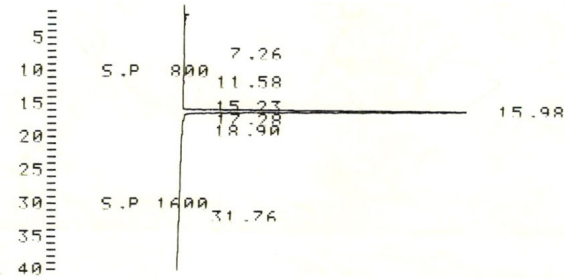

D-2500

METHOD: TAG: 253 CH: 1

FILE: 0 CALC-METHOD: AREA% TABLE: 0 CONC:

| NO. | RT    | AREA    | CONC   | BC |
|-----|-------|---------|--------|----|
| 2   | 11.58 | 13699   | 0.212  | BB |
| 4   | 15.98 | 6436206 | 99.621 | UU |
| 7   | 31.76 | 10770   | 0.167  | BB |

TOTAL

6460675 100.000

PEAK REJ : 10000

**K40k:**

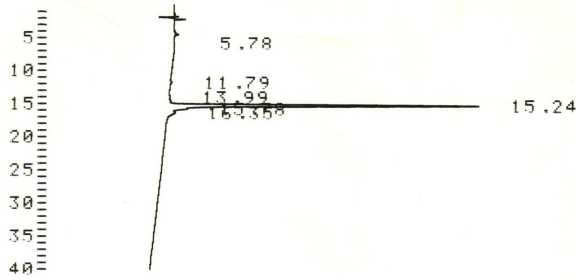

D-2500

METHOD: TAG: 352 CH: 1  
FILE: 0 CALC-METHOD: AREA% TABLE: 0 CONC:  
NO. RT AREA CONC BC  
1 5.78 20605 1.094 BR  
4 15.24 1824859 96.891 UU  
5 15.78 12772 0.628 TRR  
6 16.35 25173 1.337 TRR  
TOTAL 1883409 100.000  
PEAK REJ : 10000

**L41:**

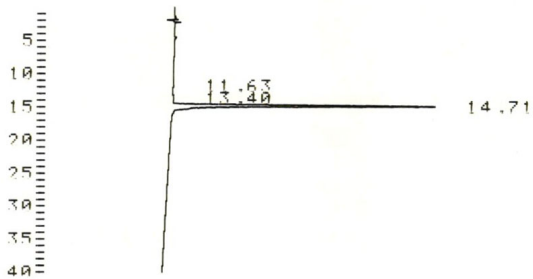

D-2500

METHOD: TAG: 357 CH: 1  
FILE: 0 CALC-METHOD: AREA% TABLE: 0 CONC:  
NO. RT AREA CONC BC  
2 13.40 10826 0.358 BU  
3 14.71 3009602 99.642 UR  
TOTAL 3020428 100.000  
PEAK REJ : 10000

**R42r:**

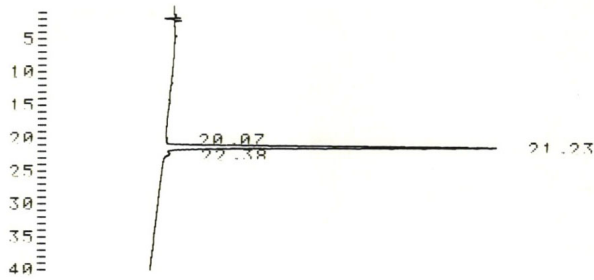

D-2500

METHOD: TAG: 358 CH: 1  
FILE: 0 CALC-METHOD: AREA% TABLE: 0 CONC:  
NO. RT AREA CONC BC  
3 20.07 11684 0.491 BU  
4 21.23 2344060 98.550 UU  
5 22.38 22794 0.958 TBB  
TOTAL 2378538 100.000  
PEAK REJ : 10000

**L43l:**

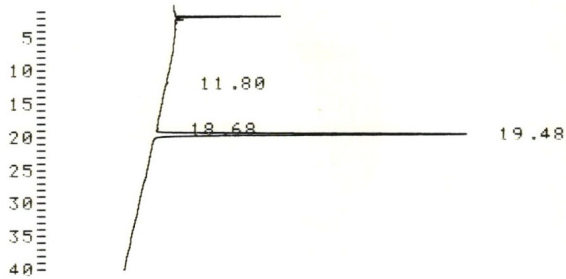

D-2500

METHOD: TAG: 366 CH: 1  
FILE: 0 CALC-METHOD: AREA% TABLE: 0 CONC:  
NO. RT AREA CONC BC  
1 11.80 20720 2.362 BU  
3 19.48 856530 97.638 UB  
TOTAL 877250 100.000  
PEAK REJ : 10000

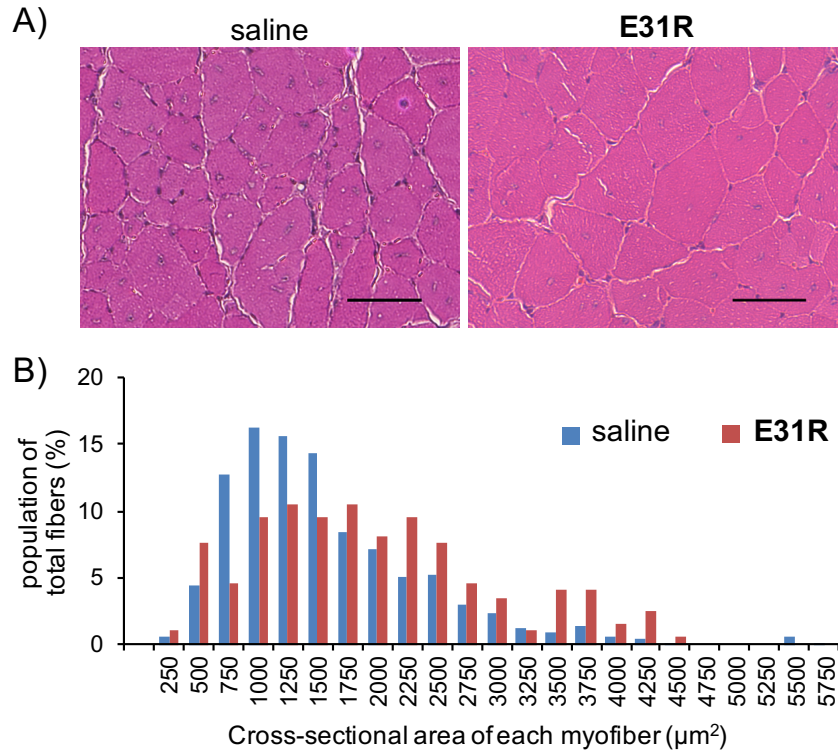

**Figure S1.** Induction of GAS muscle hypertrophy by **E31R**-treatment in Duchenne muscular dystrophic model *mdx* mice. (A) Hematoxylin and eosin staining of GAS muscles of *mdx* mice (n = 3) at day 42 after treatment with **E31R** or saline at days 0 and 14. Scale bars = 50 μm. (B) Cross-sectional areas and distributions of myofiber sizes in **E31R** or saline treated GAS muscles.

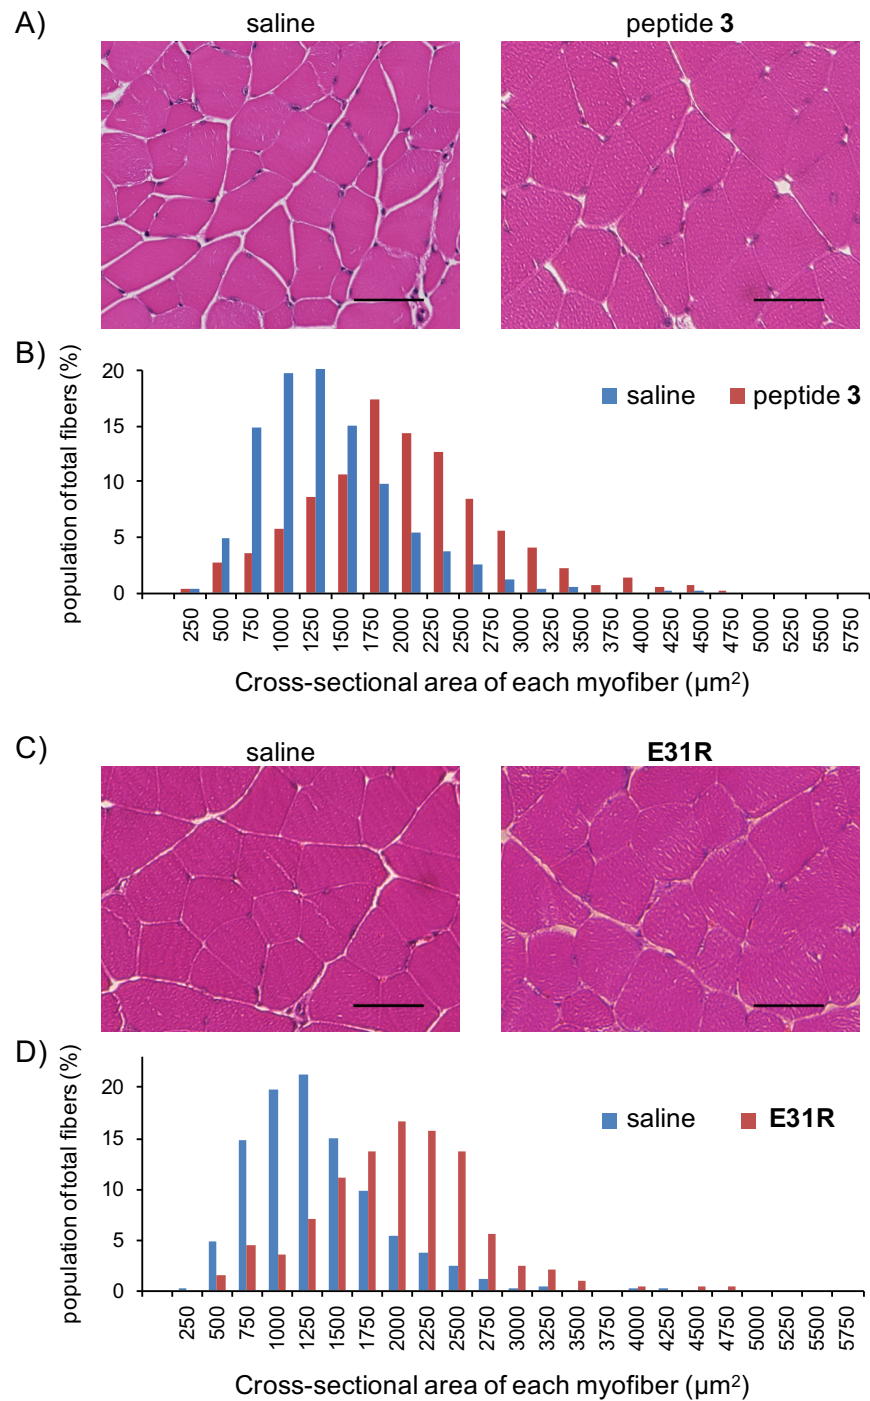

**Figure S2.** Induction of GAS muscle hypertrophy by peptide 3- or E31R-treatment in wild-type mice. (A, C) Hematoxylin and eosin staining of GAS muscles of C57BL/6 mice (n = 3) at day 42 after treatment with peptide 3 (A), E31R (C) or saline (A, C) at days 0 and 14. Scale bars = 50  $\mu\text{m}$ . (B, D) Cross-sectional areas and distributions of myofiber sizes in peptide 3 (B), E31R (D) or saline (B, D) treated GAS muscles.





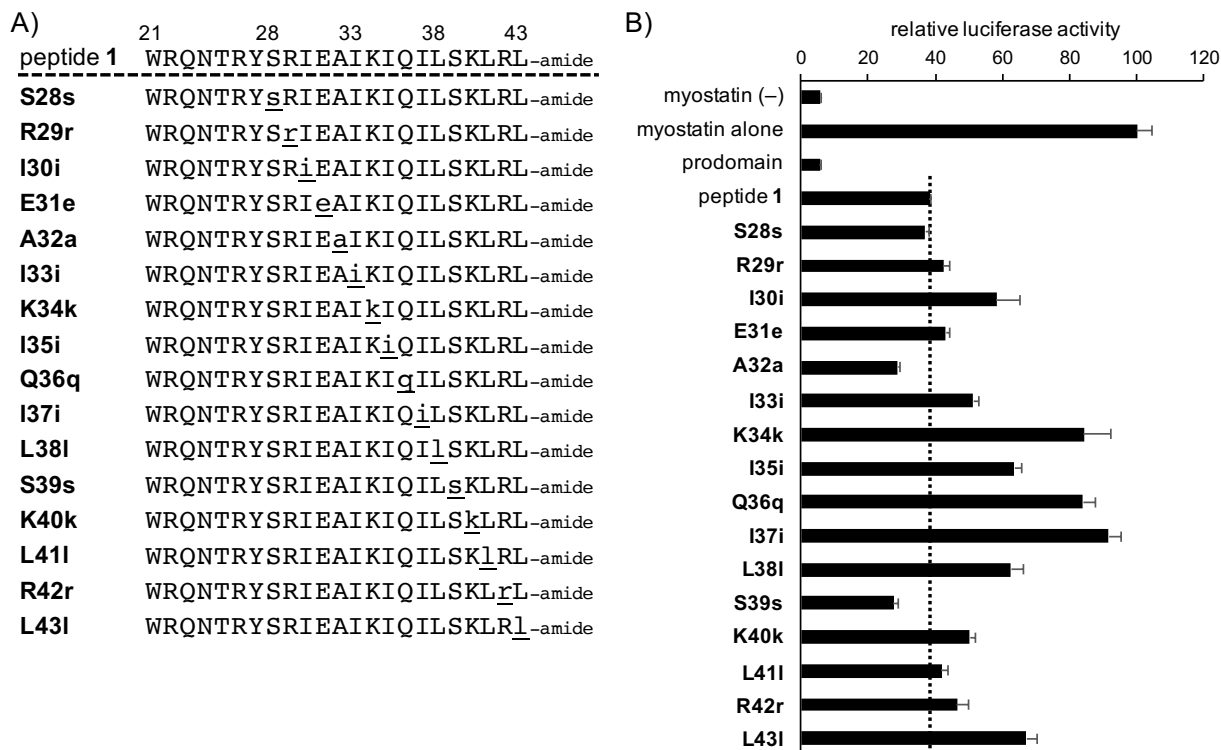

**Figure S4.** D-form scanning in peptide 1. (A) Sequences of a series of peptides substituted with D-form amino acid. The numbers above each amino acid indicate its position in the prodomain sequence of mouse myostatin. Lower case letter = D-form of the amino acid. (B) The luciferase reporter assay determined the activities of a series of peptides substituted with D-form amino acid toward myostatin inhibition relative to peptide 1. Peptide concentration: 3  $\mu$ M. Results are presented as mean values  $\pm$  SD (n = 3).

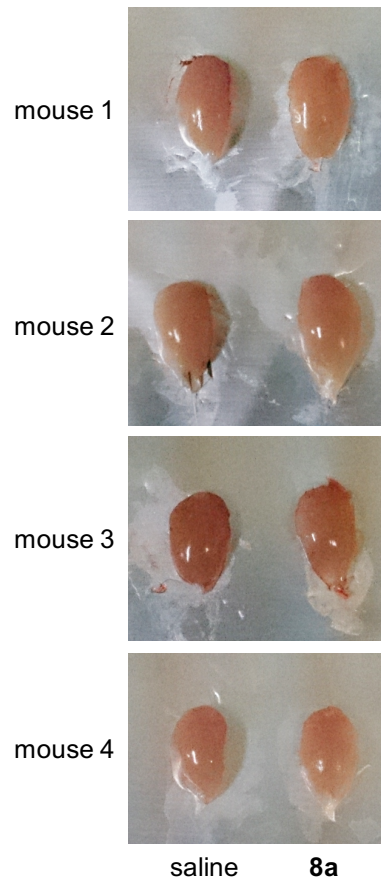

**Figure S5.** Investigation of morphological change to peptide treatment. Appearance of tibialis anterior (TA) muscles of *mdx* mice (mouse 1–4, n = 4) at day 42 after treatment with peptide **8a** (left TA) or saline (saline, right TA).
